# Supplementary material for: Protein Arginine Methyltransferase 1 Is Essential for the Meiosis of Male Germ Cells
Source: MDPI journal article supplement (doi:10.3390/ijms22157951), 2021-07-26
Supplement: s1 [file s1]

**A.**

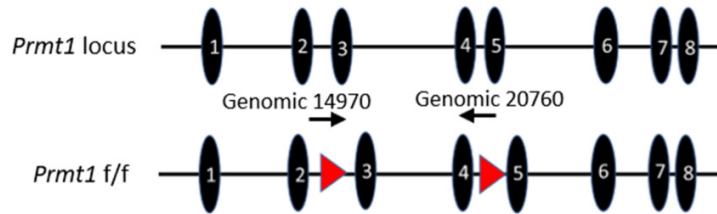

**B.**

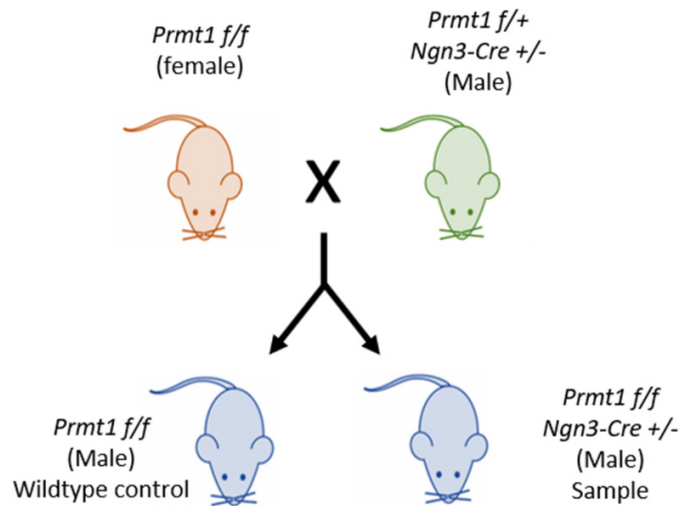

**Figure S1. Generation of PRMT1 knockout mice.** (A) Schematic representation of the wildtype [protein arginine methyltransferase 1 (PRMT1)] and floxed (2 loxP; *Prmt1*<sup>f/f</sup>) loci. The exons are represented by the black oval shapes. Red triangles denote the loxP sites. Deleted exons are 3 and 4, in which exon 3 domain is conserved for S-adenosyl methionine binding, and the arrows denote the primers (named genomic 14970 and genomic 20760) used for PCR analysis. (B) Using the Cre/loxP recombination system, germ cell-specific *Prmt1* KO mice were generated by crossing *Prmt1*<sup>f/f</sup> female mice with *Prmt1*<sup>f/+</sup>/*Ngn3-Cre* male. *Prmt1*<sup>f/f</sup>/*Ngn3-cre* male mice were used as an experiment model.

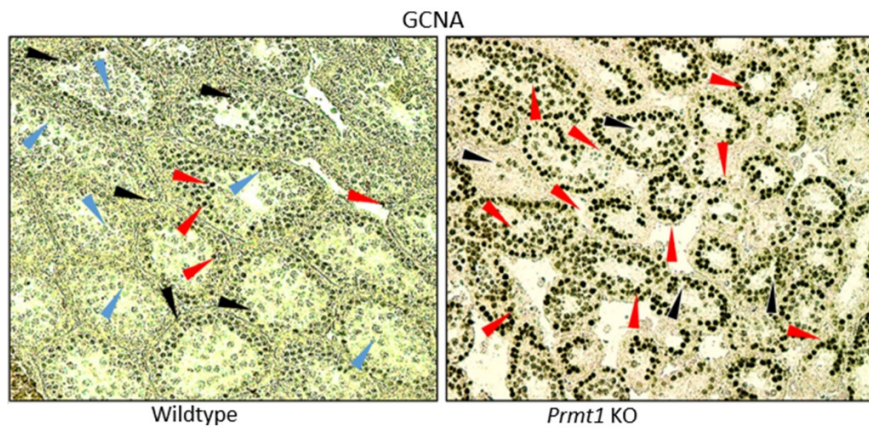

**Figure S2. Staining of germ cells in the wildtype and PRMT1 knockout mice.** Immunohistochemical staining of germ cell nuclear antigen 1 (GCNA1) was performed with the wildtype and PRMT1 knockout testes on P14. Scale bar, 50  $\mu$ m. Arrows indicate spermatocytes at different stages of spermatogenesis: black (leptotene), red (zygotene), and blue (pachytene).

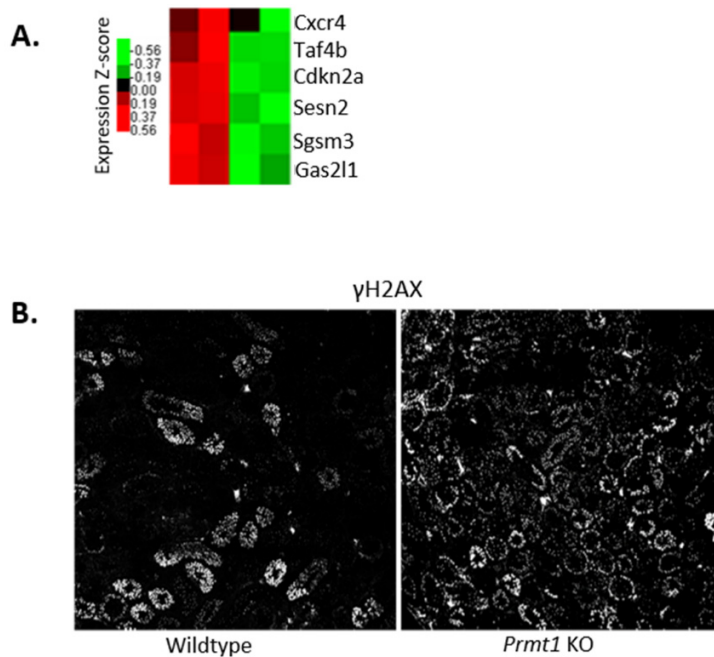

**Figure S3. PRMT1-deficient germ cells accumulate DNA double-strand breaks.** (A) Heat map showing the differentially expressed genes involved in the DNA- double strand break (DSB) repair pathway in the wildtype and *Prmt1* KO testes on P8. (B) Immunofluorescence staining of  $\gamma$ H2AX in wildtype and *Prmt1* KO testes on P14. Scale bar, 50  $\mu$ m.

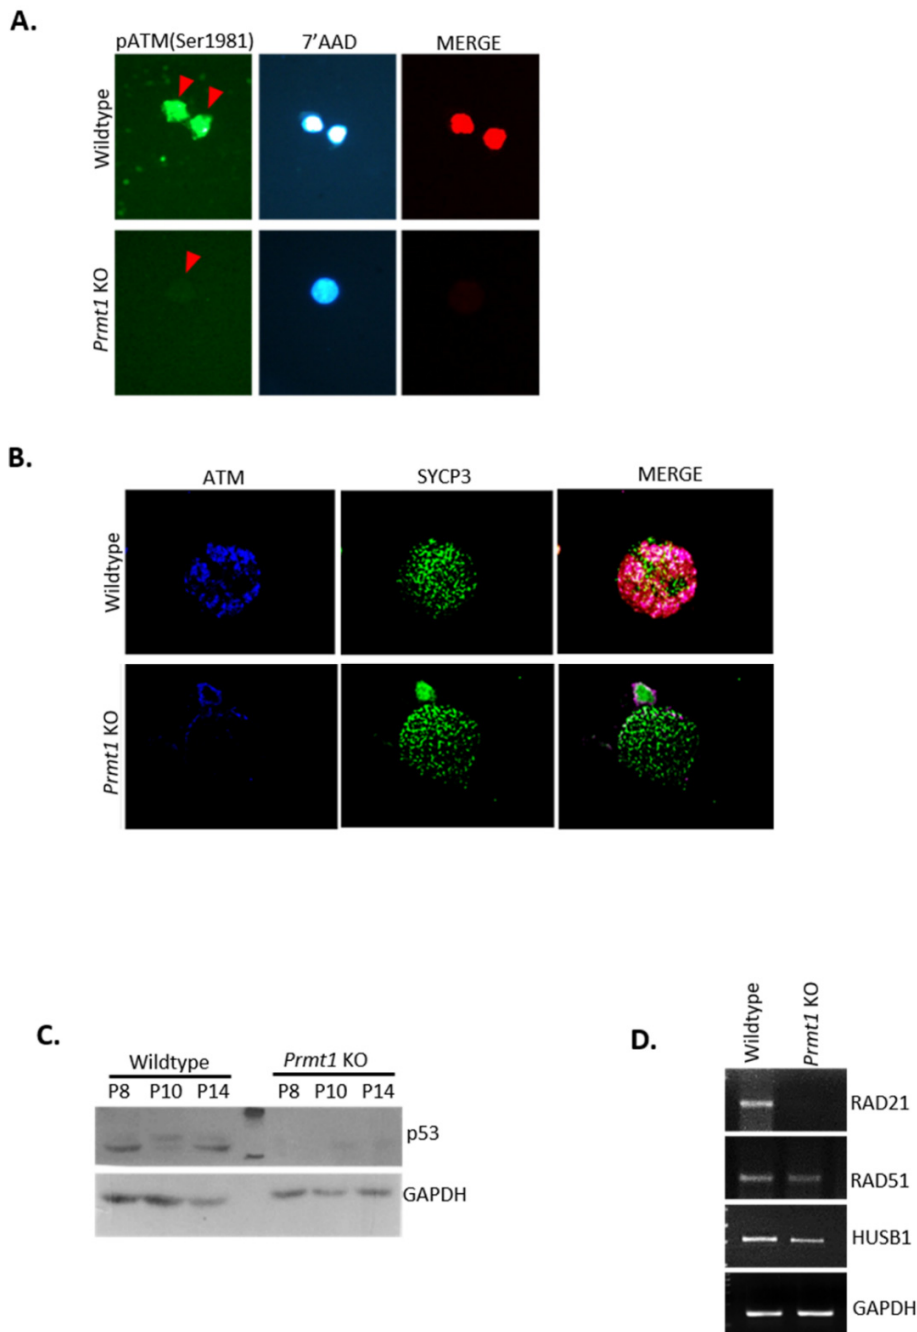

**Figure S4. Loss of PRMT1 results in the attenuation of the ATM-mediated DSB repair pathway. (A)** Immunofluorescence staining for the detection of pATM (ser1981) (green) in spermatocytes from wildtype and *Prmt1* KO testes, which were co-stained with 7'AAD (blue). **(B)** Immunofluorescence staining for the detection of ATM and synaptonemal complex protein-3 (SYCP3) on the nuclear surface spreads of leptotene spermatocytes from wildtype and *Prmt1* KO testes at P21. Scale bar, 200  $\mu$ m **(C)** Protein expression levels of p53 were checked by western blotting using whole testes lysates of P8, P10 and P14 mice. GAPDH was used as an endogenous control. **(D)** Gene expression levels of *Rad21*, *Rad51*, and *Husb1* were analyzed by RT-PCR using cDNA prepared from the total RNA of whole testes on P14. GAPDH was used as an endogenous control.

**Table S1: Fertility of *Prmt1* KO mice**

| Mating genotype    |                      | Average number of pups /litters |
|--------------------|----------------------|---------------------------------|
| Male               | Female               |                                 |
| Wildtype           | x Wildtype           | 7.5 ± 0.43                      |
| PRMT F/F           | x PRMT1 F/F Ngn3-cre | 7.8 ± 0.41                      |
| PRMT1 F/F Ngn3-Cre | x PRMT F/F           | 0                               |

The number of pups from breeding wild-type and homozygous PRMT1 knockout mice is presented as mean +/- SEM (n=5 for each group)

**Table S2: List of Primers.****Genotyping primers**

| Primer name   | Sequence (5'–3')       |
|---------------|------------------------|
| PRMT1 f/f (F) | GTGCTTGCCATACAAGAGATCC |
| PRMT1 f/f (R) | ACAGCCGAGTAGCAAGGAGG   |
| NGN3- cre (F) | GATGCAACGAGTGATGAG     |
| NGN3- cre (R) | ACAGCCGAGTAGCAAGGAGG   |

**PCR and qRT-PCR primers**

| Primer name | Sequence (5'–3')      |
|-------------|-----------------------|
| Ckit (F)    | TCAATCGAGTGTGATGGGAAA |

|            |                         |
|------------|-------------------------|
| Ckit (R)   | GGTGACTTGTTTCAGGCACA    |
| GAPDH (F)  | ATCACCATCTTCCAGGAGCGAG  |
| GAPDH (R)  | GAGATGATGACCCTTTTGGCTCC |
| HUSB1 (F)  | TACCACCGAGGTTTTGAGGC    |
| HUSB1 (R)  | GGTGCTGCTGACCTGAATGA    |
| MRE11(F)   | AGGTTTCTGGGAGCGGTTTT    |
| MRE11(R)   | CGTCAAGTGGATCTGTGGGG    |
| NGN3 (F)   | GAGAACTAGGATGGCGCCTC    |
| NGN3(R)    | GCAGTCCCTAGGTATGAGAGTG  |
| PLZF (F)   | CCCAGTTCTCAAAGGAGGATG   |
| PLZF (R)   | TTCCCA CACAGCAGACAGAAG  |
| RAD 21 (F) | GAGGCTACACCGCACAAGG     |
| RAD 21 (R) | AGAAGAAACCTGGATCTCGGC   |
| RAD 51 (F) | AACCTGACAGAGGAGCAACG    |
| RAD 51 (R) | GCACTTGCTTCAAGCTGCAT    |

**Table S3: List of antibodies.**

| <b>Antibody</b>      | <b>Catalogue number</b> | <b>Company</b> |
|----------------------|-------------------------|----------------|
| Rabbit anti-STRA8    | ab49602                 | Abcam          |
| Rabbit anti-SCP3     | ab15093                 | Abcam          |
| Rabbit anti - MRE 11 | ab33125                 | Abcam          |

---

|                                      |           |                           |
|--------------------------------------|-----------|---------------------------|
| Rabbit anti-PRMT1                    | ab73246   | Abcam                     |
| Mouse anti-ATM                       | ab78      | Abcam                     |
| Mouse anti- p-Histone H2A.X(Ser 139) | Sc-517348 | Santa Cruz Biotechnology  |
| Mouse anti- spo11                    | Sc-377161 | Santa Cruz Biotechnology  |
| Rabbit anti - GAPDH                  | Sc-25778  | Santa Cruz Biotechnology  |
| Rabbit anti- P53                     | Sc-6243   | Santa Cruz Biotechnology  |
| Mouse anti-PRMT1                     | Sc-59648  | Santa Cruz Biotechnology  |
| Rabbit anti-Adme-R                   | #13522    | Cell signaling Technology |
| Rabbit anti-Phospho -ATM (Ser1981)   | D6H9      | Cell signaling Technology |
| Anti -Rabbit IgG                     | 65-6140   | Thermo Fisher Scientific  |
| Anti-Mouse IgM                       | Sc-2064   | Santa Cruz Biotechnology  |
| Anti-Mouse IgG                       | Sc-516102 | Santa Cruz Biotechnology  |
| Anti-Mouse Alexa flour 488           | A10680    | Thermo Fisher Scientific  |
| Anti-Rabbit Alexa flour 488          | A11034    | Thermo Fisher Scientific  |
| Anti-Mouse Alexa flour 594           | A11012    | Thermo Fisher Scientific  |

---
